# Supplementary figures and images for: Passive smoking and type 2 diabetes among never‐smoking women: The Japan Public Health Center‐based Prospective Study
Source: PubMed Central journal article supplement — J Diabetes Investig. 2020 May 24;11(5):1352–8. doi: 10.1111/jdi.13259 (PMC7477535; doi:10.1111/jdi.13259), 2020-05-24

Figure S1 Flow of study population.

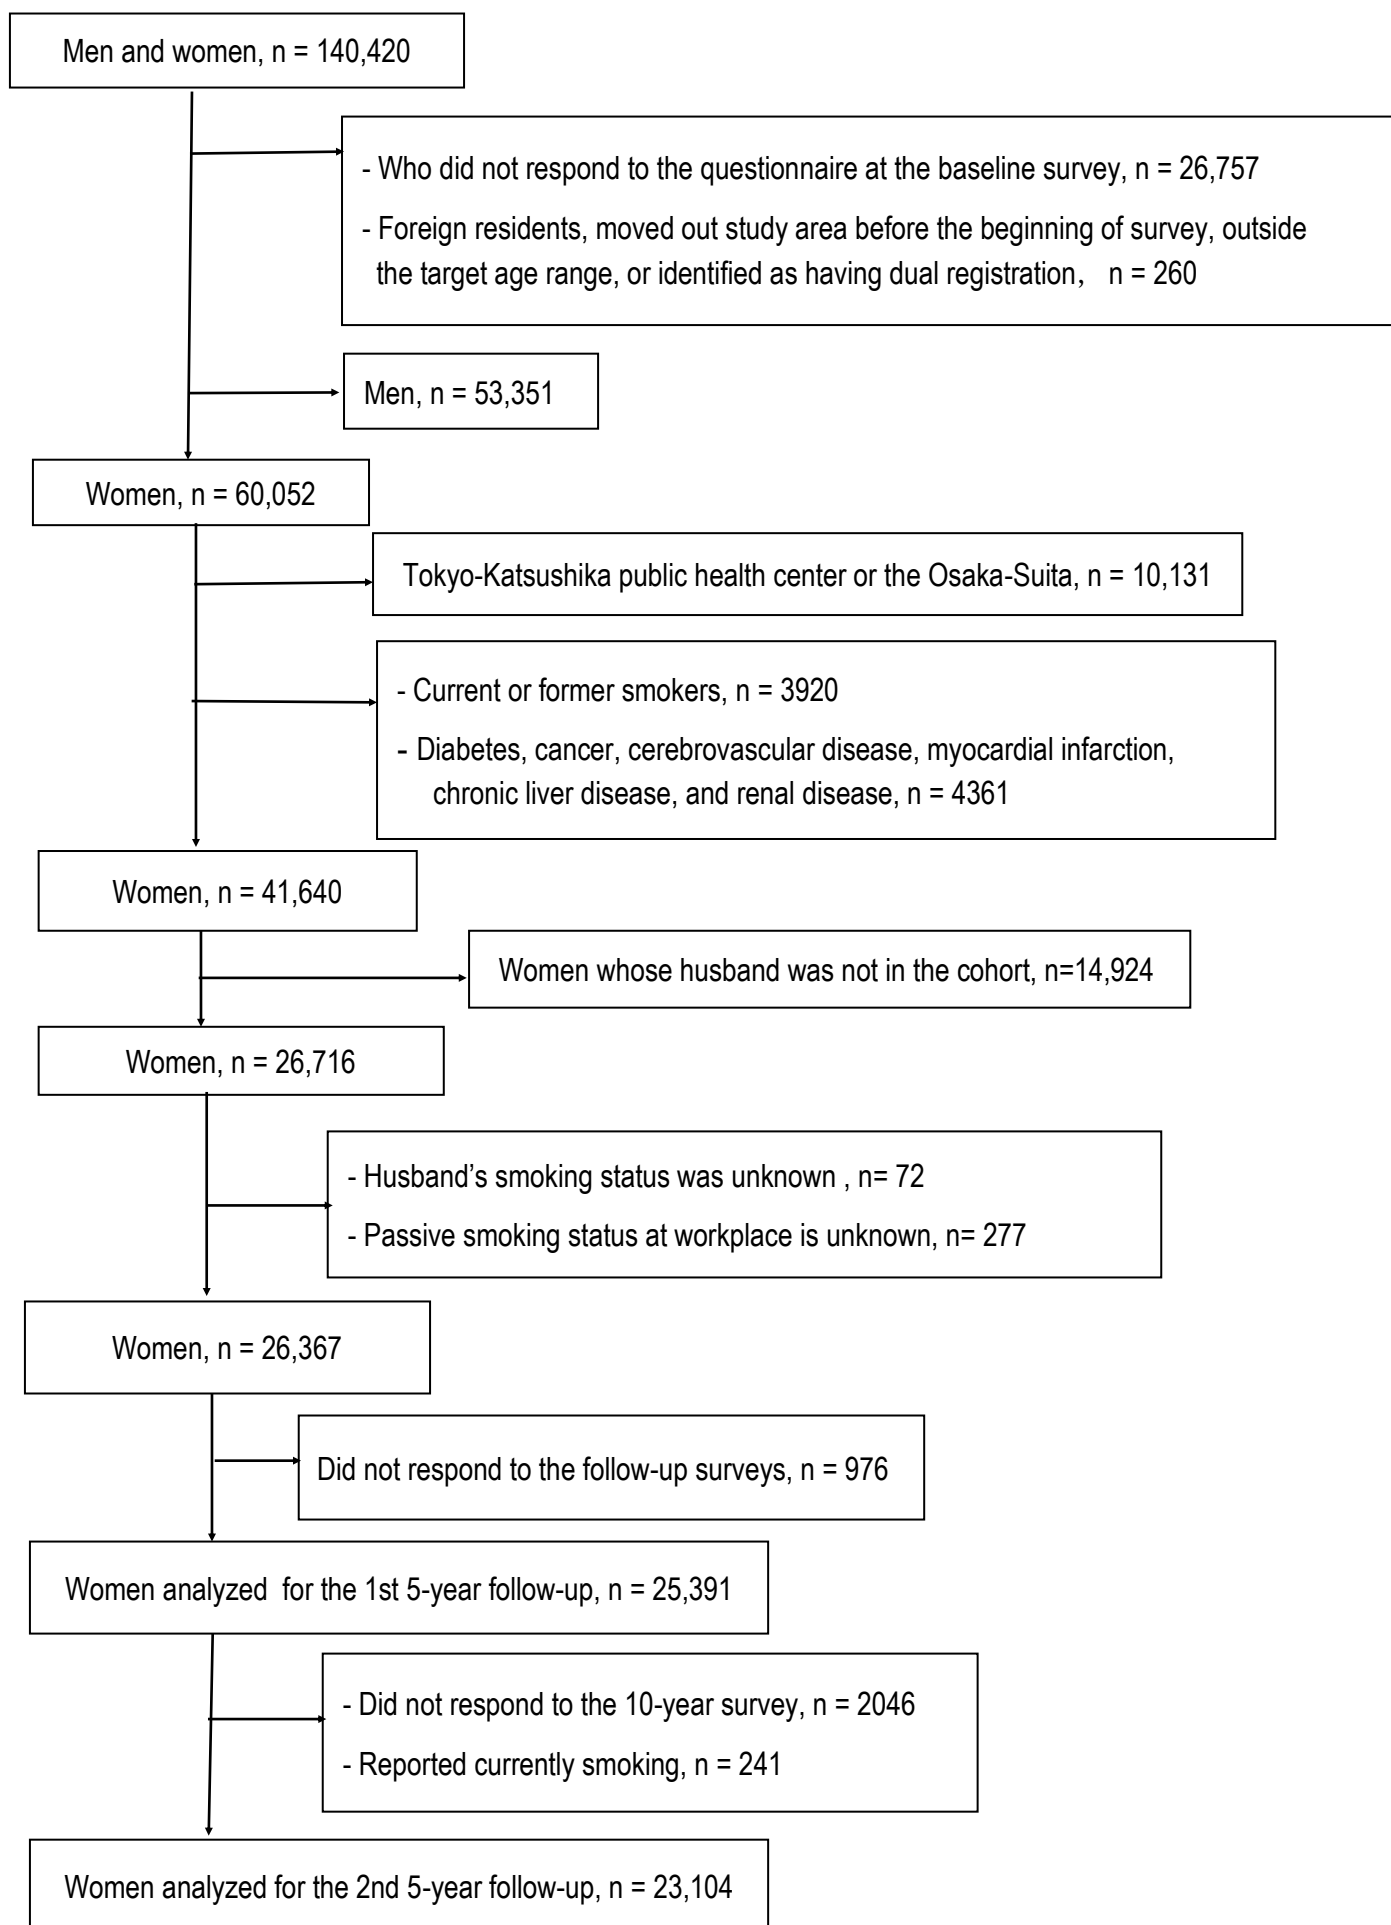

Supplement: JDI-11-1352-s001.pdf [file JDI-11-1352-s001.pdf]
